# Supplementary material
Source: publisher figshare collection journal article supplement (https://springernature.figshare.com/ndownloader/files/20498142)
Supplement: Supplementary file [file 20498142]

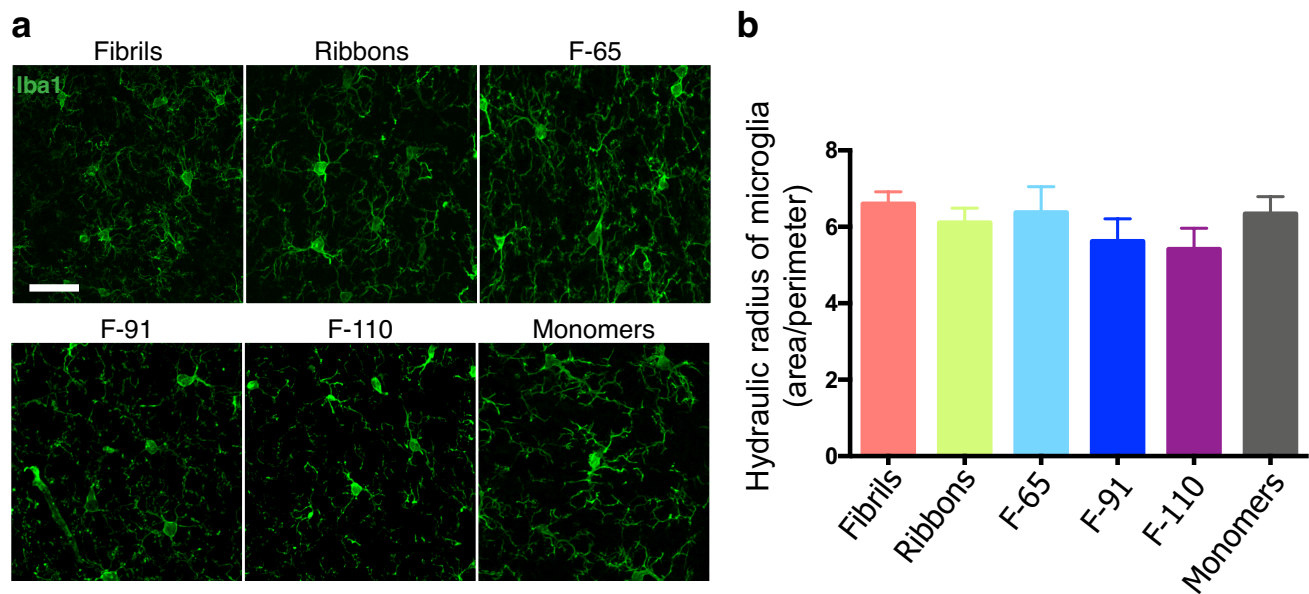

#### Additional file 6

#### Microglial morphology analysis reveals no differences in microglial activation between groups.

- Representative confocal images of Iba1-positive microglia in the OB (maximal projection).
- Microglia morphology analysis (hydraulic radius: area/perimeter). N= 4 per group; Error bars represent SEM. No significant differences were observed between groups. Scale bar = 10  $\mu$ m.
